# Supplementary material
Source: Springer Nature journal article supplement (https://www.springermedizin.de/resource/supplementary/13063_2013_1939_MOESM2_ESM.pdf/9621950)
Supplement: MOESM2 [file 9621950]

# PiTStop Trial Procedure

## Set-up stage

Identify and recruit 14 eligible homes

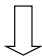

## Stage one (0 to 5 months)

Recruit residents through informed consent or consultee

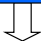

Randomise care homes

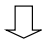

Intervention groups x7

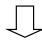

Control groups x7

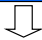

Baseline

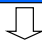

Baseline

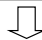

Intervention

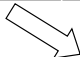

No Intervention

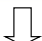

Delirium  
Practitioner

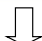

Working  
Groups

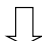

Delirium  
Champion

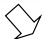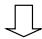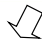

Focus groups/Interviews/ Health economics diaries

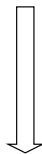

Health economics diaries

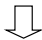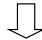

Additional recruitment

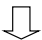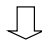

Post-intervention resident assessments

## Stage two (4 to 20 months)

## Stage three (20 to 24)
